# Supplementary material for: Preparation of two kinds of membranes with reverse wettability from waste masks for continuous oil/water separation
Source: Royal Society of Chemistry journal article supplement (doi:10.1039/d2va00295g), 2023-01-01
Supplement: d2va00295g1.pdf [file d2va00295g1.pdf]

Preparation of two kinds of membranes with reverse wettability from  
waste masks for continuous oil/water separation

Lianchao Ning<sup>a,b</sup>, Yi Liu<sup>a,b</sup>, Yang Luo<sup>a,b</sup>, Yaxin Han<sup>a</sup>, Longfei Zhang<sup>a</sup>, Ming  
Zhang<sup>a,b,\*</sup>

<sup>a</sup> School of Chemistry and Chemical Engineering, Tianjin University of Technology,  
Tianjin 300384, China

<sup>b</sup> Center of Membrane Materials and Engineering Technology, Tianjin University of  
Technology, Tianjin 300384, China

---

\* Corresponding authors.

E-mail addresses: zm2404@tjut.edu.cn (M. Zhang).

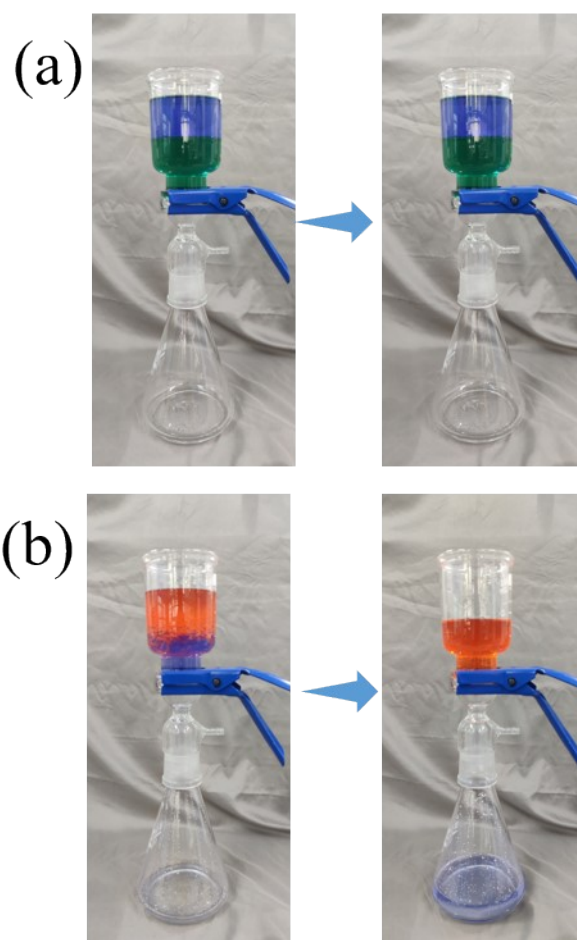

Fig. S1. Photographs before and after the oil /water separation process using PP-SiO<sub>2</sub>/DA-1.0 membrane. (a) CCl<sub>4</sub> (stained green)/water (stained blue), (b) soybean oil (stained red)/water (stained blue)

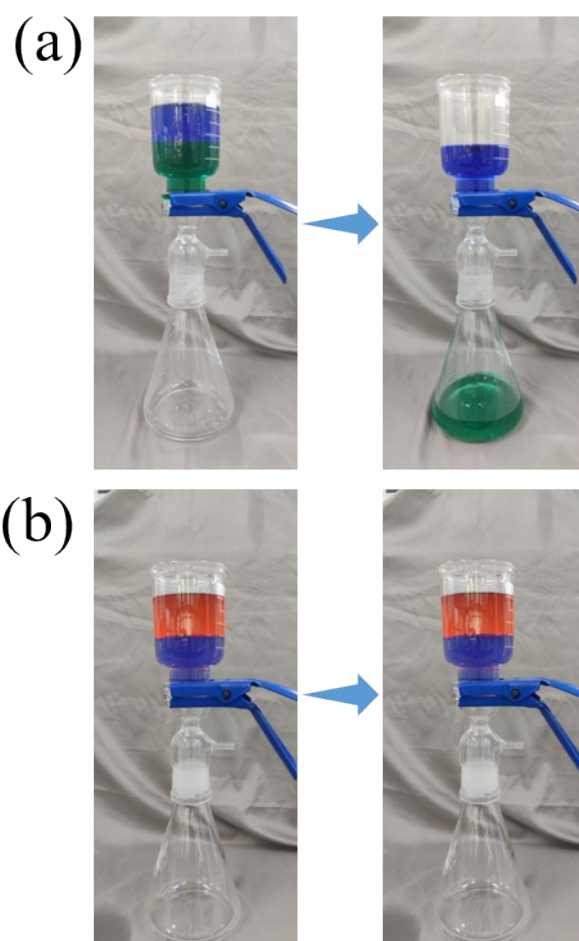

Fig. S2. Photographs before and after the oil/water separation process using PP-SiO<sub>2</sub>/OTS-1.0 membrane. (a) CCl<sub>4</sub> (stained green)/water (stained blue), (b) soybean oil (stained red)/water (stained blue)

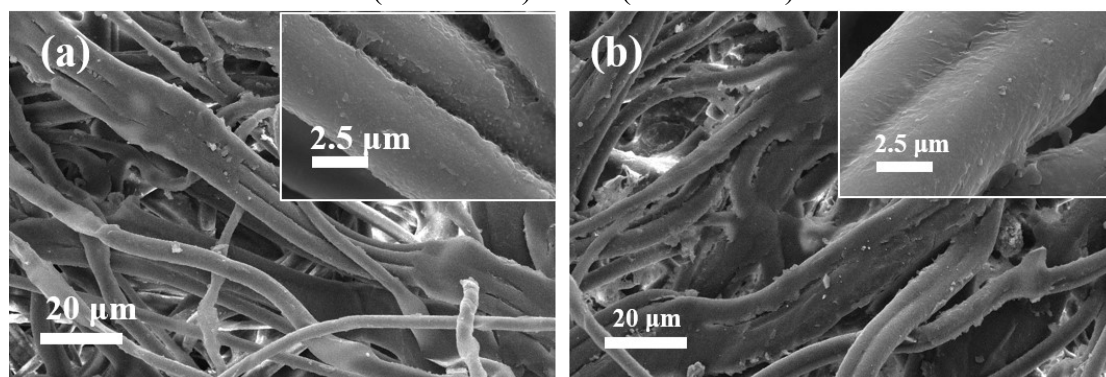

Fig. S3. SEM images of (a) WM-SiO<sub>2</sub>/DA-2.5 membranes and (b) WM-SiO<sub>2</sub>/OTS-2.5 membranes.

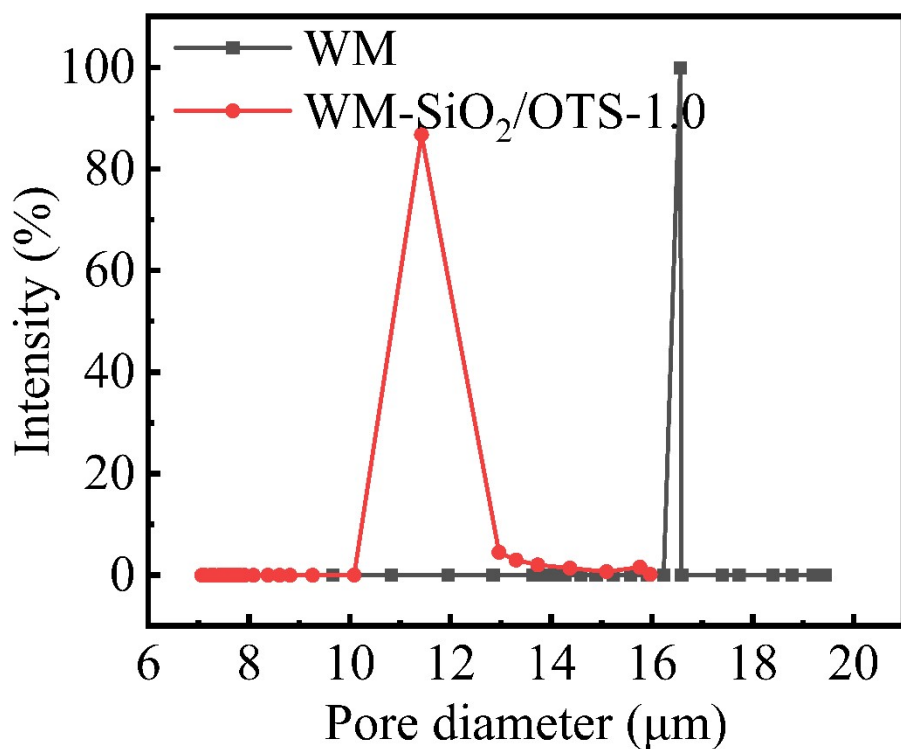

Fig. S4. Pore distribution of WM and WM-SiO<sub>2</sub>/OTS-1.0.

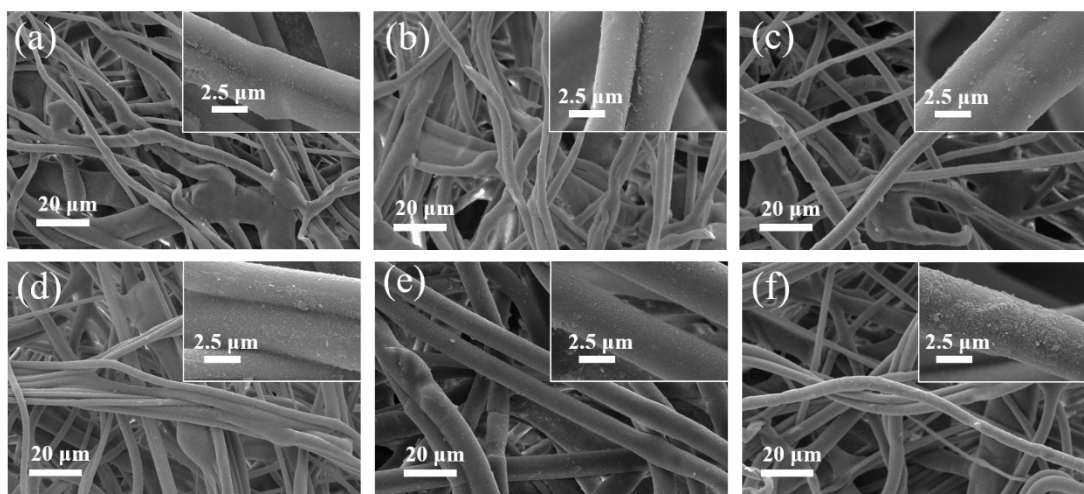

Fig. S5. SEM images of WM-SiO<sub>2</sub>/DA-1.0, (a) soaking in NaCl solution, (b) soaking in pH=2 solution, and (c) soaking in pH=14 solution; SEM images of WM-SiO<sub>2</sub>/OTS-1.0, (a) soaking in NaCl solution, (b) soaking in pH=2 solution, and (c) soaking in pH=14 solution.
